# Supplementary material for: Exploring the Phylogeography of Ancient Platycladus orientalis in China by Specific-Locus Amplified Fragment Sequencing
Source: MDPI journal article supplement (doi:10.3390/ijms20163871), 2019-08-08
Supplement: s1 [file s1]

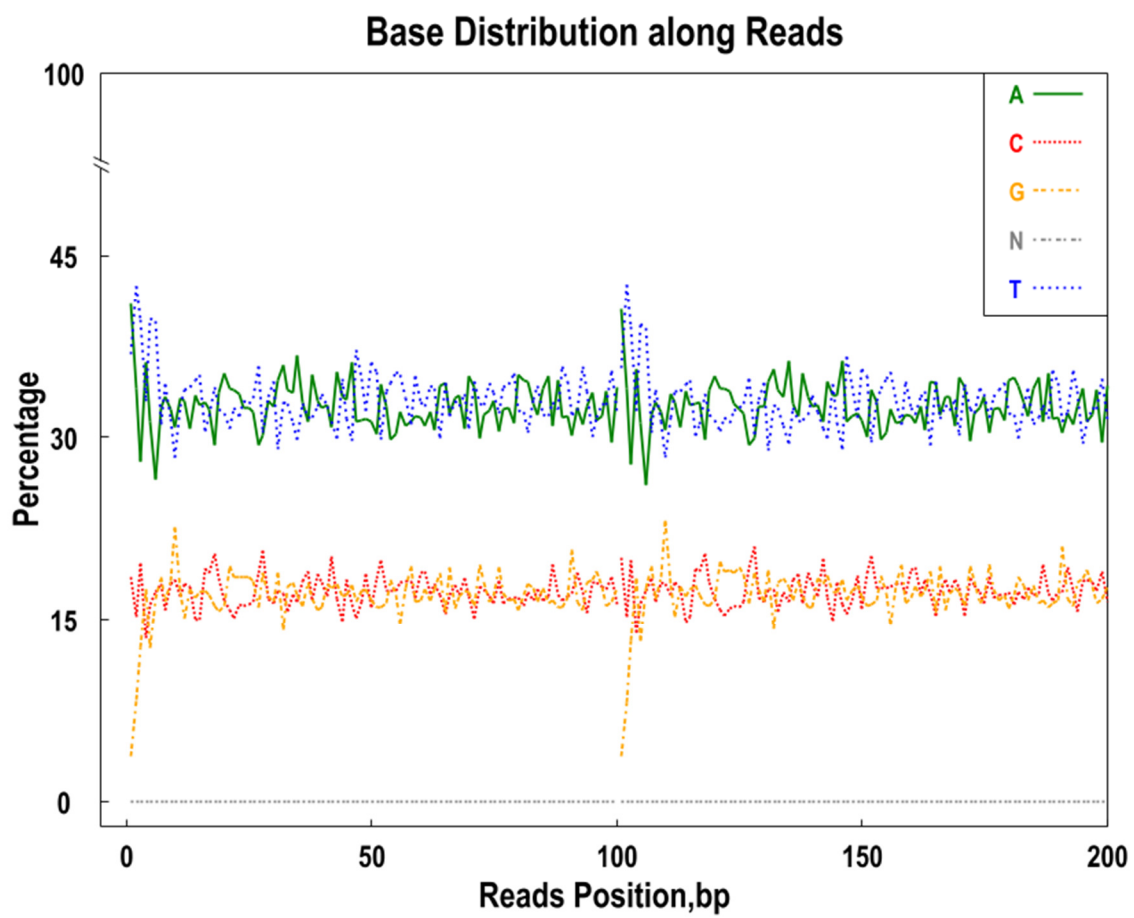

**Supplementary Figure S1:** Sequence base distribution of ancient *P. orientalis*.

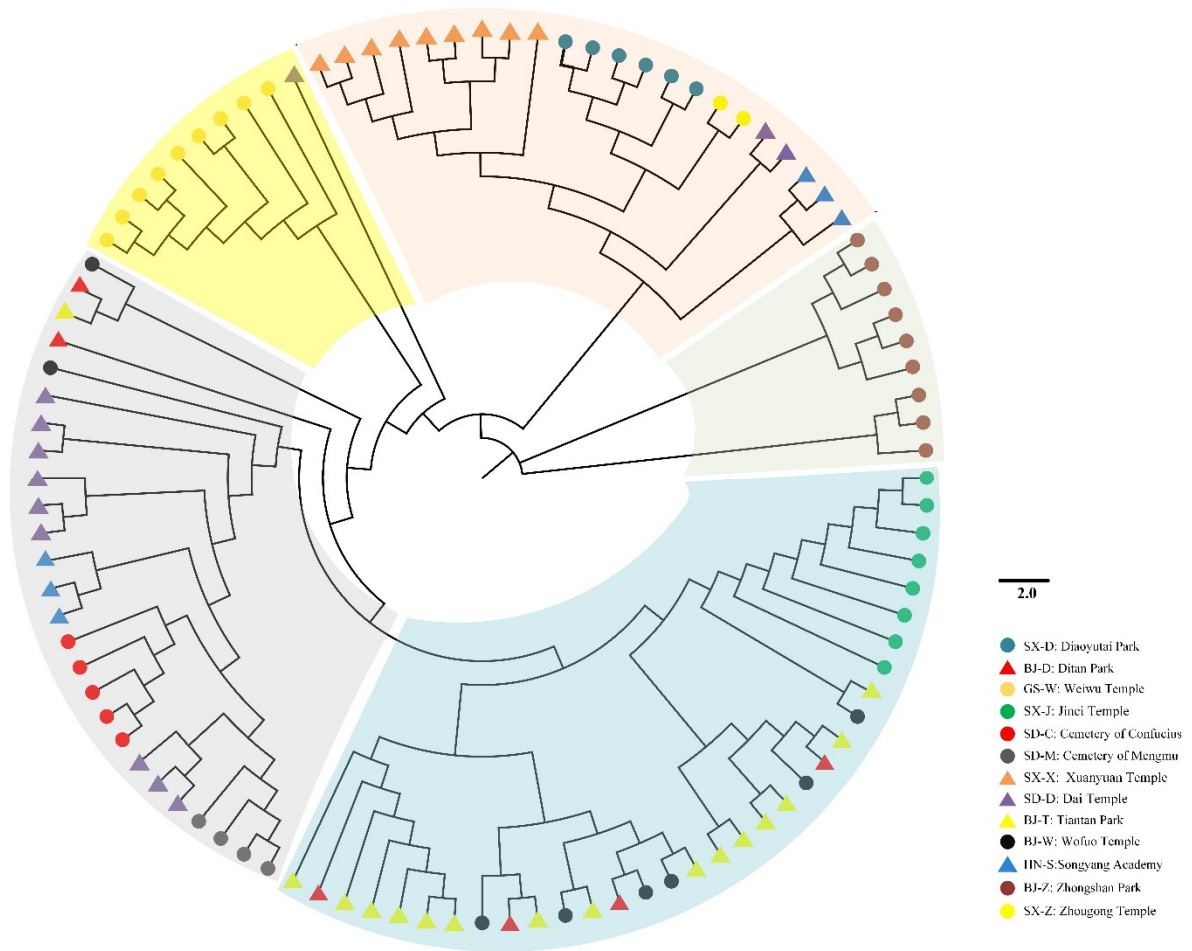

**Supplementary Figure S2:** Phylogenetic tree comprising 100 accessions constructed according to the neighbor-joining method with polymorphic SNPs.

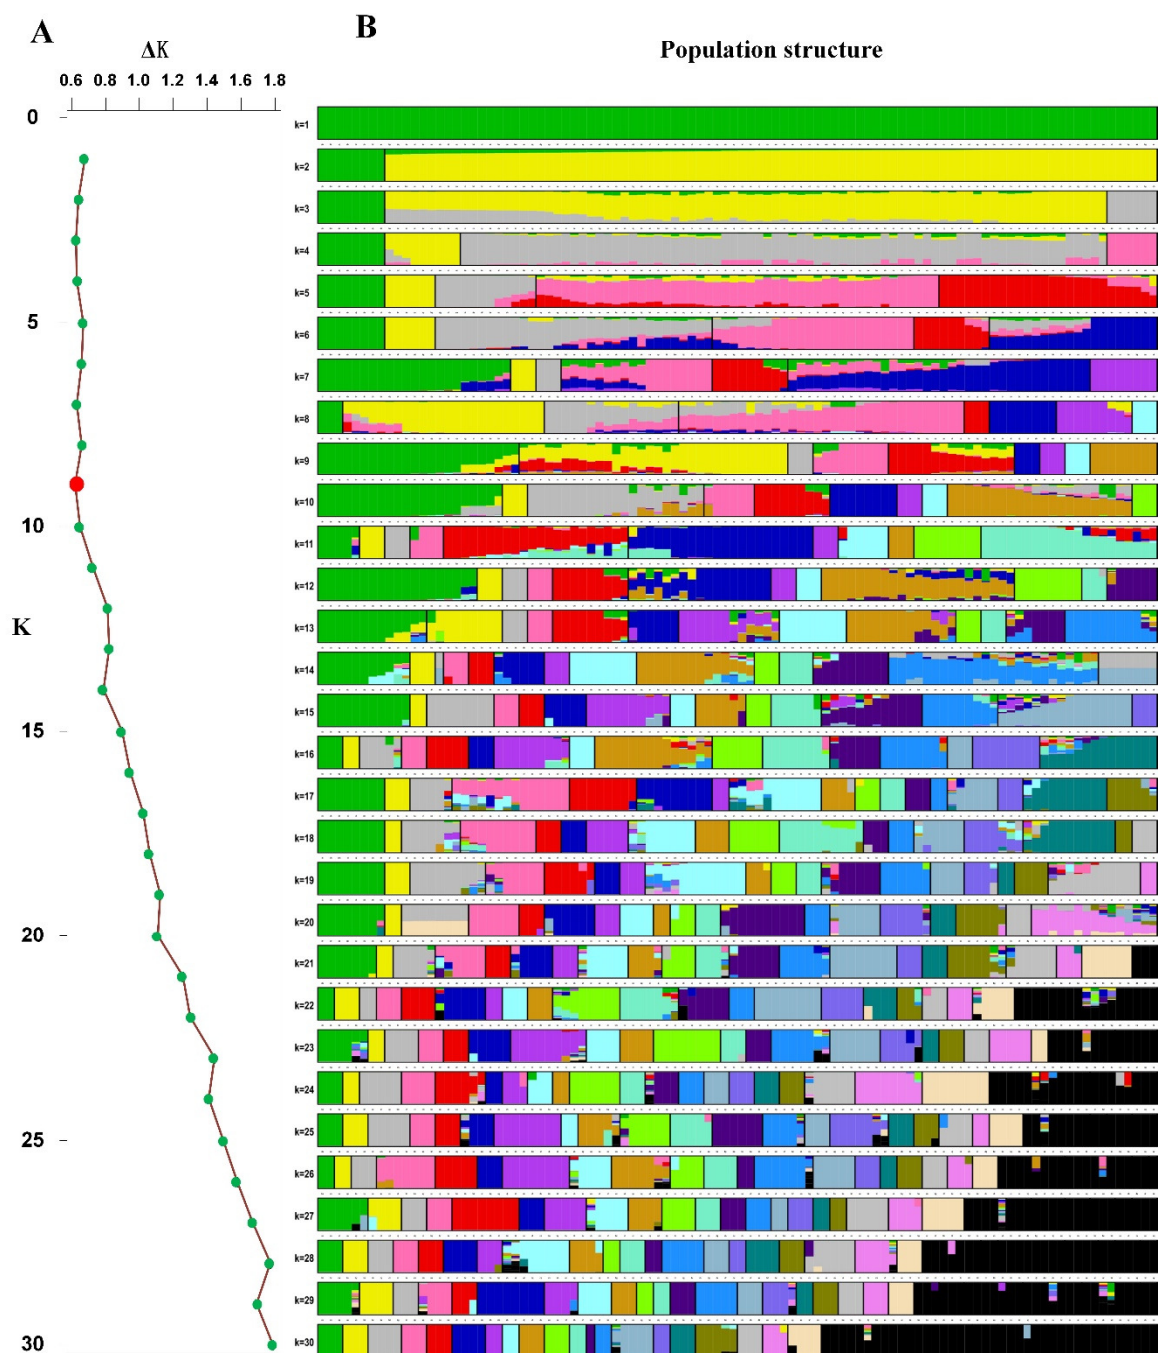

**Supplementary Figure S3:** Population structure of 100 accessions (A) and the individual clusters corresponding to each K value as determined with the Admixture software (B).

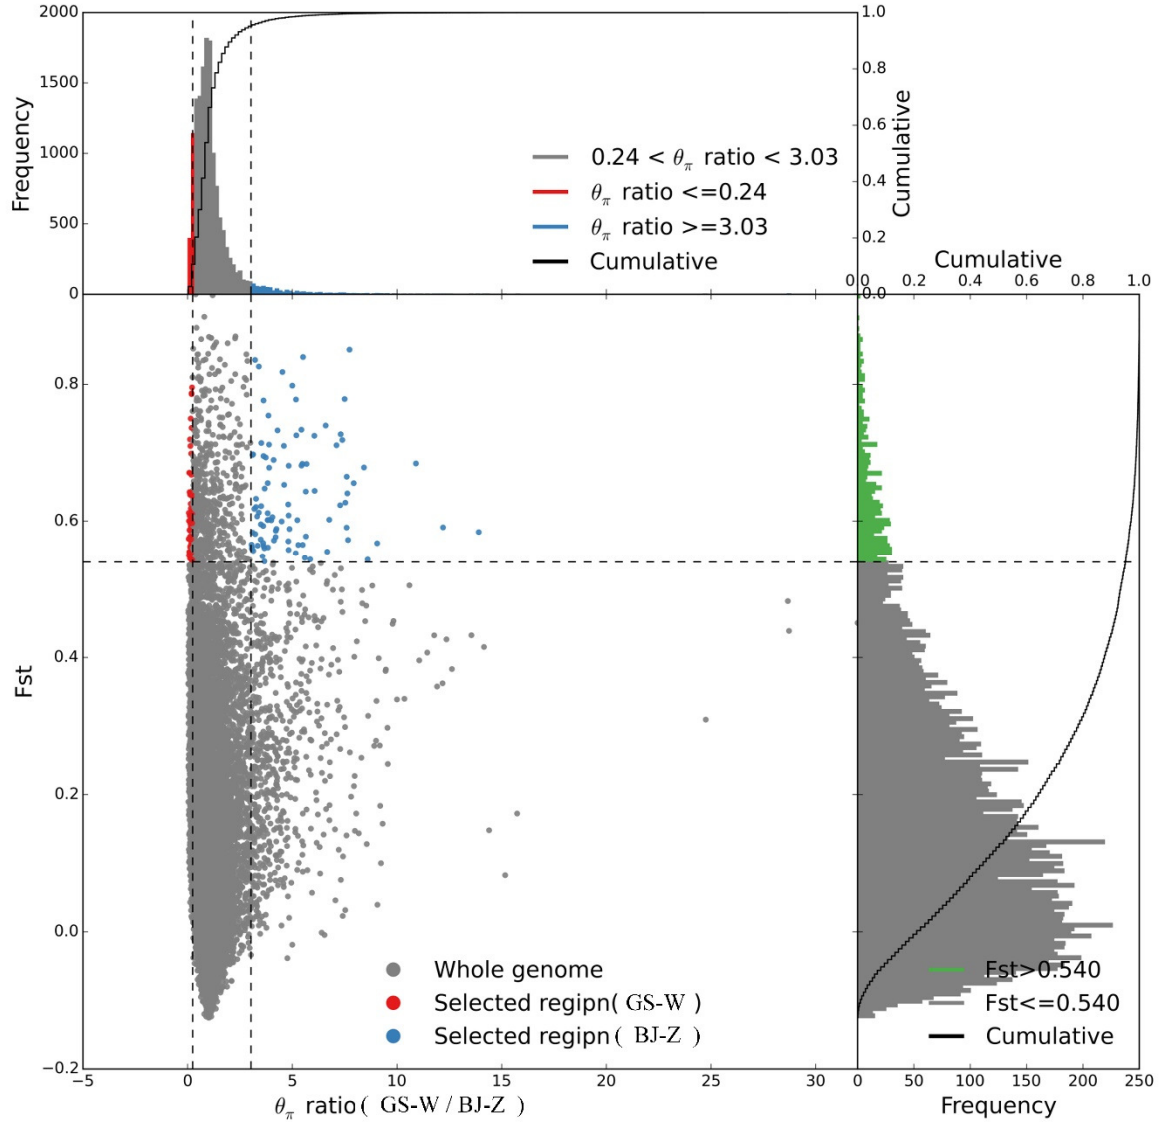

**Supplementary Figure S4:** Distribution of  $\theta\pi$  ratios and  $F_{st}$  values and the regional distribution of population differentiation. Blue and green points represent the selected regions for the BJ-Z and GS-W populations.
